# Supplementary material for: Calcification, Posterior Acoustic, and Blood Flow: Ultrasonic Characteristics of Triple-Negative Breast Cancer
Source: Hindawi journal article supplement (doi:10.1155/2022/9336185), 2022-09-26

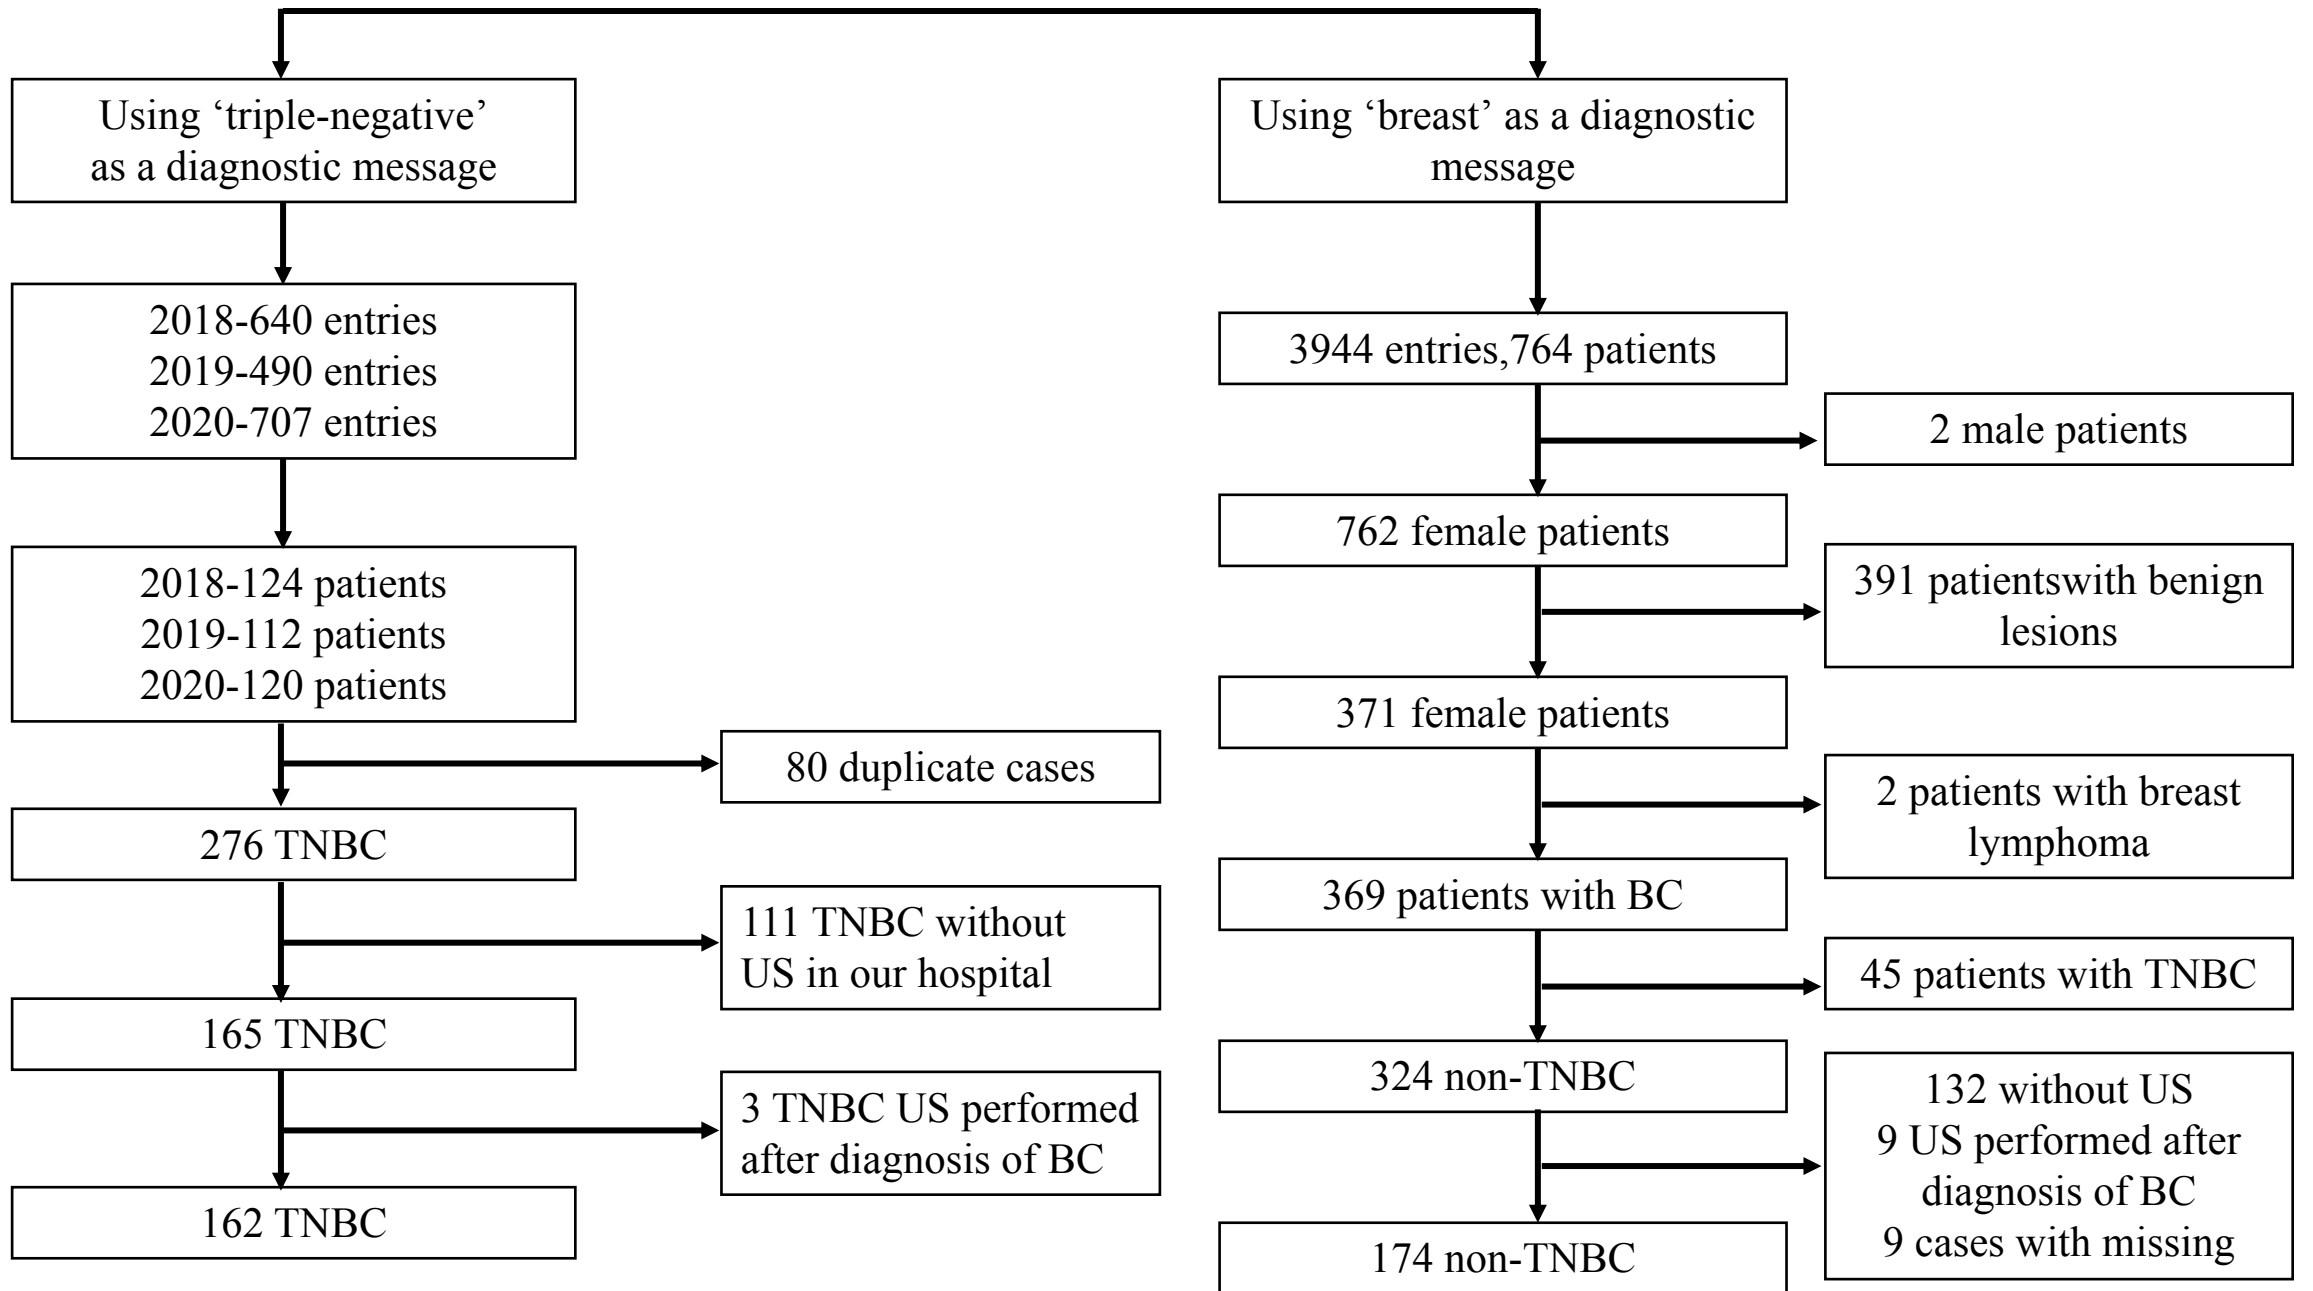

Supplement: f1 [file 9336185.f1.pdf]
